1 **Over-expression of the brassinosteroid gene *TaDWF4* increases wheat**  
2 **productivity under low and sufficient nitrogen through enhanced carbon**  
3 **assimilation**

4 **Matthew J. Milner<sup>1\*</sup> Stéphanie M. Swarbreck<sup>1,2</sup>, Melanie Craze<sup>1</sup>, Sarah Bowden<sup>1</sup>, Howard**  
5 **Griffiths<sup>2</sup>, Alison R. Bentley<sup>1,3</sup>, and Emma J. Wallington<sup>1</sup>**

6 <sup>1</sup> NIAB, 93 Lawrence Weaver Road, Cambridge, CB3 0LE, UK

7 <sup>2</sup> Department of Plant Sciences, University of Cambridge, Cambridge, CB2 3EA, UK

8 <sup>3</sup> Current address: International Maize and Wheat Improvement Center (CIMMYT), Texcoco,  
9 Mexico

10 \*Corresponding author

11 **Abstract:**

12 There is a strong pressure to reduce nitrogen (N) fertiliser inputs while maintaining or increasing  
13 current cereal crop yields. Brassinosteroids, (BR), are a group of phytohormones essential for  
14 plant growth and development, that have been demonstrated to regulate several agronomic  
15 traits. *DWF4* encodes a cytochrome P450 that catalyses a rate-limiting step in BR synthesis.  
16 We show that overexpression of the dominant shoot expressed homoeologue *TaDWF4-B* in  
17 wheat can increase plant productivity by up to 105% under a range of N levels on marginal  
18 soils, resulting in increased N use efficiency (NUE). We show that a two to four-fold increase in  
19 *TaDWF4* transcript levels enhances the responsiveness of genes regulated by N. The  
20 productivity increases seen were primarily due to the maintenance of photosystem II operating  
21 efficiency and carbon assimilation in plants when grown under limiting N conditions and not an  
22 overall increase in photosynthesis capacity. The increased biomass production and yield per  
23 plant in *TaDWF4* OE lines could be linked to modified carbon partitioning and changes in

24 expression pattern of the growth regulator Target Of Rapamycin, offering a route towards

25 breeding for sustained yield and lower N inputs.

26

27 **Introduction:**

28 Wheat (*Triticum aestivum* L.) is a major crop worldwide providing 23% of human dietary  
29 protein<sup>1</sup>. In many parts of the world, on-farm wheat yields have plateaued since the mid-1990s,  
30 although the yield capacity of cultivars has continued to increase<sup>2</sup>. Modern agricultural practices  
31 include the development of high-yielding varieties of cereal grains, expansion of irrigation  
32 infrastructure, modernization of management techniques, distribution of hybridized seeds, and  
33 the addition of synthetic fertilisers and pesticides to increase and protect yields. However, this  
34 approach has led to direct losses of reactive N to the aquatic environment which lower water  
35 quality through eutrophication, coupled with the loss of N<sub>2</sub>O and the high CO<sub>2</sub> emissions during  
36 fertiliser production, so the environmental consequences are substantial<sup>3-5</sup>. As it has been  
37 estimated that only 33% of N applied to a field is taken up by the crop, a multi-faceted approach  
38 is crucial to reducing the necessary application of fertiliser as well as losses of the applied  
39 fertiliser<sup>6,7</sup>. Improving NUE (defined as ratio of grain produced per unit of N supply) can be  
40 achieved by improving yield under a constant N supply. Thus far, strategies to improve the yield  
41 capacity of crop cultivars have focused on photosynthesis<sup>8-10</sup>, with gains in biomass and yield  
42 reaching 40%<sup>11,12</sup>. However, this is not sufficient and reducing our reliance on synthetic fertiliser  
43 will also rely on identifying ways to reduce wheat N requirement, i.e. being able to produce  
44 wheat with lower N input without a reduction in yield or grain quality<sup>2</sup>. While identifying genes  
45 and pathways regulating specific aspects such as N uptake, assimilation or remobilization can  
46 provide some advantages, approaches that target regulatory components of N metabolism are  
47 more promising. In particular, understanding and identifying genes that can regulate N  
48 responsiveness, i.e. the overall capacity of plants to induce morphological and physiological  
49 changes according to the external availability of N, are eagerly sought<sup>6,13</sup>.

50 Many domesticated crop species are polyploid and it is thought that the genome duplication  
51 events and the resultant chromosome rearrangements have been a major driving force creating

52 biological complexity, novelty and adaptation to environmental changes<sup>14–16</sup>. Wheat, an  
53 allohexaploid with genome AABBDD, is the product of two ancient hybridization events: *Triticum*  
54 *uratu* (A) and *Aegilops spp.* (B) hybridised 0.5 million years ago<sup>17</sup>, to form the tetraploid *Triticum*  
55 *turgidum*, which then underwent a second hybridisation ~10,000 years ago with *Aegilops*  
56 *tauschii* (D) to form *Triticum aestivum*<sup>18</sup>. A more nuanced process of continuous diversification  
57 and allopolyploid speciation to produce the network of polyploid *Triticum* wheats has also been  
58 described<sup>19</sup> and with the advent of whole genome resequencing, the B-subgenome has been  
59 shown to exhibit most variation with multiple alien introgressions and deletions<sup>20</sup>. The presence  
60 of homeoalleles in hexaploid wheat increases both coding sequence variation *per se* and  
61 regulatory variation with the new promoter and transcription factor combinations and functional  
62 diversification of the duplicated genes<sup>21,22</sup>. This genome asymmetry and variation has  
63 consequences for quality traits such as the control of wheat seed storage proteins, biotic and  
64 abiotic traits, agronomic traits and response to pests and diseases<sup>23–25</sup>.

65 Phytohormones are known to modify agronomically important traits, in particular  
66 brassinosteroids (BR)<sup>26,27</sup>. BR have been shown to positively affect traits including tiller  
67 number, leaf size and angle, photosynthesis and yield<sup>28–31</sup> plus other desirable traits, including  
68 N use efficiency (NUE), disease resistance, and end use quality traits<sup>31–34</sup>.

69 Manipulating levels of *DWF4/CYP90B*, the rate-limiting step in the BR synthesis pathway, has  
70 been shown to increase yield, biomass production, tiller number and quality traits in diverse  
71 plant species<sup>30,31,34,35</sup>. The mechanism of how altering BR levels impacts yield is still not  
72 completely understood, but in many plant species an increased rate of carbon fixation has been  
73 observed, suggesting that photosynthesis is key to the increased yields<sup>30,34</sup>.

74 An explanation of how the BR pathway controls so many different agronomically important  
75 phenotypes was shown through the direct interaction between BZR1 (Brassinazole Resistant 1),

76 the transcription factor activating BR related genes, and the Target Of Rapamycin (TOR), the  
77 growth regulator sensing the carbon (C) status of the plant<sup>36,37</sup>. Overexpression of TOR in  
78 plants also mirrors many of the same phenotypes as modification of the BR pathway,  
79 suggesting that TOR may be the mode of increased growth and yields shown by many BR over-  
80 expressors. The BR and TOR pathways directly interact through the BR transcription factor  
81 BZR1, and the TOR kinase. The TOR kinase can maintain the activation potential of BZR1 and  
82 its role in growth promotion, by keeping the BZR1 protein stable<sup>37</sup>. Reducing TOR expression  
83 by RNAi silencing led to a decreased ability of BR regulated genes to be upregulated, arrested  
84 plant growth and, abolished the ability of increased BZR1 to promote growth when high levels of  
85 sugar were present<sup>38</sup>.

86 While many studies have shown that modification of the BR pathway can increase yields, plants  
87 have typically been assessed under nutritionally replete conditions. In order to assess if the  
88 same yield gains could be achieved in wheat grown on either marginal soils, or with lower  
89 fertiliser inputs, we generated over-expression lines to test whether modification of DWF4 levels  
90 could drive productivity gains and/or increase NUE.

## 91 **Results:**

### 92 ***The wheat DWF4 gene family has seven members***

93 To identify putative orthologs of DWF4/CYP90B in wheat, the amino acid sequence for the rice  
94 DWF4/CYP90B (locus Os03g0227700) was used in a BLASTP search using wheat genomics  
95 resources at Ensembl ([http://plants.ensembl.org/Triticum\\_aestivum/Info/Index](http://plants.ensembl.org/Triticum_aestivum/Info/Index)). Seven amino  
96 acid sequences were identified with high homology to the rice DWF4 amino acid sequence (e  
97 value <  $1e^{-50}$ , and > 70% homology), these were encoded by four sequences located on  
98 chromosome 3 (one on chromosome 3A, one on chromosome 3B, two sequential copies on  
99 chromosome 3D) and three sequences located on chromosome 4 (Suppl. Fig. 1a). The amino

100 acid sequences were clustered by chromosome group (Suppl. Fig. 1a). Putative proteins  
101 encoded by sequences on chromosome group 4 tended to be more similar to each other  
102 (98.62% to 99.01% identity) compared to those on chromosome group 3 (87.97% to 95.77%  
103 identity). Within chromosome group 3, *TaDWF4-3D2* was the most distinct within the family  
104 (Suppl. Table 1).

105         Comparison of the group 4 homoeologue putative protein sequences revealed that 4A  
106 contains two large insertions when compared to the other homoeologues and *OsDWF4* (Suppl.  
107 Fig. 2). The first insertion is located between exons 1 and 2, and the second insertion is located  
108 between exons 5 and 6, relative to the predicted CDS in the B and D homoeologues. The genes  
109 on chromosome 4 showed the highest expression levels, in particular *TaDWF4-4B*, while low to  
110 no expression could be seen for any of the genes on chromosome 3 in the wheat  
111 expression.com databases<sup>39</sup> (Suppl. Fig. 1a). The expression patterns of the identified  
112 homoeologues on chromosome 4 showed unbalanced expression with *TaDWF4-4B* dominating  
113 expression in the shoot (70.9%), and *TaDWF4-4A* dominating expression in the spike (56.6%).  
114 There was no dominant homeologue expressed in the roots as *TaDWF4-4A* and *TaDWF4-4B*  
115 showed similar but higher expression in the roots than *TaDWF4-4D*.

116

### 117 ***DWF4 gene duplications in wheat***

118 In diploid plant species where the *DWF4* gene family has been characterized (including  
119 *Arabidopsis*, rice, and maize (*Zea mays*), *DWF4* is encoded by a single gene<sup>28,40,41</sup>. It is  
120 interesting that in hexaploid wheat, cv. Chinese Spring, seven putative orthologs could be  
121 identified, suggesting that there may have been one or possibly two duplication events: the first  
122 duplication event leading to the presence of *DWF4* genes on both chromosome 3 and

123 chromosome 4 groups, and the second duplication event leading to two DWF4 genes on  
124 chromosome 3D, as the three gene models are co-linear on chromosome 3D.

125 The *DWF4* inter-chromosomal duplication event in wheat, which led to the presence of the  
126 *DWF4* gene on both chromosome groups 3 and 4, cannot be found in crop or model species  
127 such as Arabidopsis, rice, maize or brachypodium (*Brachypodium distachyon*) (Suppl. Figure  
128 1b). In rice, the closest related proteins to OsDWF4 are other cytochrome P450s more  
129 commonly known as CPD1 or CPD2 sharing 46.7 percent identity at the amino acid level  
130 (Ensembl v 46). In Arabidopsis, the closest protein to AtDWF4 (AT3G50660) is also a  
131 cytochrome P450, CYP72A1 sharing 36.1% identity at the amino acid level (Ensembl v 46). In  
132 maize and brachypodium the closest related proteins are ZmCYP724A1 (Zm00001d003349)  
133 with 50.5% identity and BdCYP724A1 (BRADI\_5g12990v3) with 47.4% identity.

134 The inter-chromosomal duplication of the *DWF4* genes can also be inferred for both *T.*  
135 *urartu* and *Aegilops tauschii*, two of the three wheat progenitor species (progenitors of the A and  
136 D genomes in *T. aestivum*), as well as in the tetraploid *T. dicoccoides* (Suppl. Figure 1b). An  
137 intra-chromosomal duplication in *Aegilops tauschii* on chromosome 3, supports the hypothesis  
138 that these copies arose before the progenitors hybridized. Therefore, one gene duplication  
139 event seems to have arisen before the progenitor species hybridized, and a second event after  
140 the hybridization occurred to produce modern bread wheat.

141

142 ***Overexpression of TaDWF4-4B in wheat leads to the upregulation of BR responsive***  
143 ***genes***

144 Given that *TaDWF4-4B* in Chinese spring showed the highest expression levels in the shoot  
145 tissues identified in public RNAseq databases, we selected this homeologue for over-expression  
146 in hexaploid wheat (Suppl. Figure 1). A total of forty independent T<sub>0</sub> plants were generated in

147 the cv. Fielder, with *TaDWF4-4B* CDS expressed from the constitutive promoter, *OsActin*<sup>42</sup>. In  
148 six out of nine T<sub>0</sub> plants with a single T-DNA insertion, *TaDWF4* transcript levels (including both  
149 transgene and endogenous gene) were significantly increased from 1.6 to 4.9-fold compared to  
150 wild type (Suppl. Figure 3a). In the four over-expressing (OE) lines showing the highest  
151 *TaDWF4* transcript levels, we measured the transcript levels for EXORDIUM (EXO),  
152 *DWF3*/*CPD*/*CYP90A*, *BZR2* and *BES1*, as these genes either have been shown in Arabidopsis  
153 to be upregulated by BR<sup>43</sup> or involved in the BR pathway<sup>44–46</sup>. *TaEXO* and *TaBES1* transcript  
154 levels were significantly higher than WT in the four OE lines tested ( $p < 0.05$ ) and followed the  
155 same trend as those of *TaDWF4* (Suppl. Figure 3b). *TaBZR2* and *TaDWF3* did not show  
156 significantly increased expression in OE wheat lines and this contrasts with previous reports in  
157 other plant species of either *DWF4* overexpression or the application of exogenous BL<sup>44,47</sup>.

### 158 ***Overexpression of TaDWF4-4B increases productivity under low to high N levels***

159 The four highest expressing transgenic lines (OE-1, OE-2, OE-3 and OE-4) and a  
160 corresponding null segregant (WT) were grown in pots on a low fertility soil supplemented with  
161 NH<sub>4</sub>NO<sub>3</sub> to reach field-equivalent N levels of 70, 140 and 210 kg/ha N. A low fertility soil with  
162 limited N was used as a substrate in order to demonstrate N deficiency symptoms. The lowest  
163 level (70 kg/ha N) corresponds to a N deficiency and the highest level (210 kg/ha N) to the  
164 agronomic level typical of current UK agronomic practice<sup>48</sup>. All four OE lines tested showed  
165 significant increases in yield per plant when compared to the WT at all 3 N levels ( $p = 0$ ; Figure  
166 1a). There was also a large increase in above ground biomass ( $p = 0$ ), ranging from a 45% to  
167 101% increase in the OE lines compared to WT (Figure 1b). An overall increase in tiller number  
168 ( $p = 0$ ; Figure 1c), grain number per plant ( $p = 0$ ; Figure 1e) and grain weight measured as  
169 thousand grain weight (TGW) ( $p = 0$ ; Figure 1f) were also observed. The OE lines also showed  
170 a significant increase in harvest index (HI, defined as the proportion of biomass in the grain  
171 divided by the total biomass) relative to WT ( $p = 0$ ; Figure 1d). The significant change in yield



172 per plant under all levels of N tested resulted in a significant increase ( $p = 0$ ) in the NUE in OE  
173 lines relative to WT (Suppl. Fig 5), as expected with yield increase. Full statistical comparisons  
174 are included in Suppl Tables 2-7.

175 As anticipated, increasing N supply led to increased yield in both WT and OE lines. The  
176 WT line showed a defined N dependent yield increase, with OE lines producing higher yield at  
177 all N levels and generally mirroring the gains seen by WT. The converse effect was seen for  
178 biomass where increased N levels decreased the differences seen in biomass; as N became  
179 less limiting the differences in biomass decreased (Fig. 1b). Overexpression of *TaDWF4-B* in  
180 cv. Fielder led to significantly increased growth compared to the WT even under low N  
181 conditions, and also led to higher productivity per plant.

#### 182 ***Nitrogen responsive genes in TaDWF4 OE lines show altered expression:***

183 At the whole plant level, OE lines appear to be highly responsive to low N levels, maintaining  
184 yield increases under N-deficient to replete conditions. The expression of four genes known to  
185 be differentially regulated under high or low N conditions in wheat were selected to test the N-  
186 responsiveness at the transcript level of an OE line (OE-1) relative to WT<sup>49,50</sup>. The genes  
187 selected encode the high and low affinity N uptake transporters (NRT2.1 and NRT1), a N  
188 transporter involved in N translocation through the plant (NPF7.1), and glutamate  
189 dehydrogenase (GHD2), an enzyme involved in N remobilization in response to limiting carbon  
190 (C). All four genes tested show a clear increase in OE-1 and WT transcript levels under low N  
191 compared to replete N conditions in both shoots and roots of 10 day-old seedlings grown in a  
192 hydroponic system (Figure 2).

193 Transcript abundance in OE-1 shoot tissues under N limited conditions showed  
194 significantly lower expression of *TaNRT1* ( $p = 0$ ), *TaNPF7* ( $p < 0.001$ ) and *TaGDH2* ( $p < 0.001$ ),  
195 but not *TaNRT2.1* ( $p = 0.07$ ), compared with WT. Under replete conditions, no significant

196 differences were found between OE-1 and WT. A similar pattern was seen in root tissues under  
197 N limited conditions with significantly lower expression of *TaNRT1* ( $p = 0$ ), *TaNPF7* ( $p < 0.001$ ),  
198 *TaNRT2.1* ( $p < 0.001$ ), and *TaGDH2* ( $p = 0$ ), in the OE-1 line compared with WT. Under replete  
199 conditions only *TaNRT1* and *TaNRT2.1* showed significantly lower expression in OE-1  
200 compared with WT ( $p < 0.01$ ,  $p < 0.05$ ).

201         Given the putative role of DWF4 in N response we also measured the level of transcripts  
202 for *TaDWF4* from chromosome 4 in the shoots and roots of WT Fielder plants grown under four  
203 N levels (0, 1/3, 2/3 and full as a proxy for 0, 70, 140 and 210 kg/ha fertiliser application rate).  
204 Transcript levels of *TaDWF4* were higher in the shoots relative to the roots of wheat plants  
205 grown under the four N levels ( $p < 0.05$ , Suppl. Fig 6). Increased N concentrations led to higher  
206 *TaDWF4* transcript levels in the shoots and lower transcript levels in the roots (Suppl. Fig 6,  $p <$   
207  $0.05$ ). The effect of N level on *TaDWF4* transcript levels was driven by the difference between  
208 the lowest N levels. There were no significant differences in transcript levels observed amongst  
209 the 1/3 N, 2/3 N and N full treatments. *TaDWF4* expression therefore appears to be responsive  
210 to changes in N levels under very limiting N conditions promoting expression in the roots and  
211 decreasing expression in the shoots in WT Fielder.

212 ***Increases in yield and biomass in TaDWF4 OE lines are independent of N uptake and***  
213 ***translocation:***

214 To further understand how the OE lines were driving an increase in yields, the flux of N was  
215 measured using  $^{15}\text{N}$  tracer studies. Uptake and translocation of N was measured between the  
216 four OE lines and the WT when grown under low N conditions for two weeks and supplied  
217 with  $^{15}\text{N}$  to quantify short term uptake and translocation from the root to the shoot. No significant  
218 differences were seen in the uptake or translocation of N between any of the lines tested (Figure  
219 3a, b) (ANOVA, *n.s.*).

220 To understand if the OE lines showed altered N content compared with WT over a  
221 longer plant growth cycle, total N was measured in the grain and senesced flag leaf from plants  
222 grown under three N levels to compare N taken up from the soil at the end of the life cycle. At  
223 harvest, no significant differences in flag leaf N content could be measured in plants grown on  
224 eq. 210 kg/ha N (Figure 3c), while the grain N content was significantly lower in the OE  
225 compared to WT. The decrease in grain N content in OE lines compared to WT was also  
226 measured when plants were grown under three different N levels (Figure 3d) (ANOVA  $p < 0.05$ ).

### 227 ***TaDWF4-B overexpression maintains photosynthesis under N limitation:***

228 In rice, OE of *DWF4* led to an increase in leaf level photosynthetic C fixation<sup>30</sup>. Leaf level CO<sub>2</sub>  
229 assimilation per unit area was measured on the fourth expanded leaf in the OE-1 and WT lines  
230 grown under both low (eq. 70 kg/ha) and high (eq. 210 kg/ha) N levels. No differences in CO<sub>2</sub>  
231 assimilation could be measured when OE-1 and WT plants were supplied with adequate N and  
232 high light (Figure 4a). A significant increase in CO<sub>2</sub> assimilation over a range of CO<sub>2</sub>  
233 concentrations in the OE-1 line was observed when plants were grown under low N conditions  
234 and high light (Figure 4b). The increase in CO<sub>2</sub> assimilation in OE-1 compared to WT under low  
235 N was not driven by a significant difference in chlorophyll content, a major sink for N in a plant,  
236 as both the OE-1 and WT line had similar levels of chlorophyll under both low and high N  
237 (Figure 4c) ( $p = 0.34$ ). Overall, this suggests that under low N conditions an increased  
238 photosynthetic capacity may drive the yield and biomass gains measured in the OE lines.  
239 However, this is not the case when plants are grown under N replete conditions.

240 To understand if the plants were able to maintain photosynthesis at a higher level when grown  
241 under lower input conditions, plants were grown on the same low fertility soil as shown in Figure  
242 1 supplemented with either 70 or 210 kg/ha equivalent N. Spot measurements of CO<sub>2</sub>  
243 assimilation were taken under growth chamber conditions, with light levels at 250  $\mu\text{mol m}^{-2} \text{s}^{-1}$

244 and 400 ppm CO<sub>2</sub>. Under these conditions a significant increase in CO<sub>2</sub> assimilation could be  
245 measured in OE-1 compared to WT, under both N levels tested (Figure 5a) ( $p < 0.05$ ).  
246 Measurements of chlorophyll fluorescence were taken as proxy for the operating efficiency of  
247 photosystem II ((Fm'-Fo') / Fm') on light adapted leaves from plants grown under low (70 kg/ha)  
248 vs high (210 kg/ha) N conditions. OE-1 plants had a greater proportion of PSII centers available  
249 to collect the saturating light pulse than that of WT plants under both low and high N conditions  
250 (Figure 5b) ( $p = 0$ ). While PSII efficiency declined in WT plants grown under low N conditions ( $p$   
251  $< 0.001$ ), this was not the case for OE-1 plants.

252 To understand the effect of continued photosynthesis on C content, flag leaves of fully senesced  
253 plants grown on 210 kg/ha equivalent N were measured. There was a significant increase (1 to  
254 2%) in the flag leaf C content in OE-1 lines compared to WT ( $p < 0.01$ ) (Suppl. Fig 7). Soluble  
255 sugars were measured in fourteen-day old seedlings grown in hydroponic solution under low  
256 (1/3, 70 kg/ha) or replete (Full, 210 kg/ha) conditions. Under replete N conditions, WT showed  
257 significantly higher levels of both soluble sugars measured (D-fructose, D-glucose) ( $p < 0.05$ )  
258 (Figure 6a-d), led mostly by large differences in the roots of both sugars measured. Under low  
259 N conditions, there were similar levels of both sugars per gram dry weight in the shoots of OE-  
260 1 plants relative to WT plants. Although the distribution in the two tissues tested of the sugars is  
261 different and significant differences were observed in both sugars in both tissues measured ( $p <$   
262  $0.05$ ).

263 Next, we tested whether the effect of *TaDWF4-B* overexpression on photosynthesis and soluble  
264 sugar/C levels was mediated by TOR. Significantly higher transcript levels for *TaTOR* were  
265 measured in the roots of OE-1 relative to WT, when plants were grown under both low and  
266 replete N in hydroponics. *TaTOR* transcripts levels were higher in roots than shoots in OE-1 ( $p$   
267  $< 0.05$ ) and a significant difference in TOR expression was seen under both low and high N  
268 growth conditions ( $p < 0.05$ ) (Figure 6d, e). The effect of low N led to increased *TaTOR*

269 expression in OE-1 shoots, however the converse was seen in WT shoots where *TaTOR*  
270 transcripts levels were markedly reduced under low N. In roots OE-1 showed significantly higher  
271 transcript levels than WT under both high and low N (Figure 6e).

272 ***Indirect selection has potentially increased BR activity in modern wheat varieties:***

273 To understand if the increased photosynthesis observed in the OE lines has already been  
274 indirectly selected for in modern wheat cultivars, seven diverse spring wheat cultivars as well as  
275 Fielder and OE-1 were tested for both their ability to maintain PSII operating efficiency under  
276 limiting N levels, and to determine if this could be a factor in determining NUE differences. The  
277 ability of the different varieties to maintain PSII electron transport could be seen in three  
278 different varieties including the former elite UK spring wheat cultivar Paragon (Figure 7A)  
279 suggesting that this trait may have been indirectly fixed via breeding. *TaDWF4* transcript levels  
280 were lower in all cultivars tested compared to OE-1, and there was no significant difference  
281 amongst cultivars (Figure 7b). The lack of selection for higher BR levels/DWF4 expression is  
282 further supported as lines which maintained PSII reaction centers open had both high and low  
283 NUE, where NUE is defined as yield on low N (eq. 70 kg/ha) divided by yield on high N (eq. 210  
284 kg/ha) (Suppl. Fig 8).

285

286 **Discussion:**

287 In this study, we identified the functional orthologues of the rice DWF4 in wheat and generated  
288 OE lines to understand whether modification of the BR pathway could be used to increase  
289 wheat NUE and drive an increase in yield as seen in other crops with modified BR functions. We  
290 identified seven putative orthologues in wheat, four on chromosome 3 plus three on  
291 chromosome 4, and have shown that the putative orthologues on chromosome 3 had low level  
292 to no expression, whereas the 4B homoeologue had the highest expression, based on data

293 available from public wheat expression databases. Significant tissue type differences were  
294 seen in the expression of the three homoeologues, suggesting that specific regulatory elements  
295 may control BR levels in particular tissues to increase plant growth in wheat. The duplication of  
296 putative orthologues on the two different chromosome groups also appears to have happened  
297 before hexaploid bread wheat arose 5.5 Mya, as each of the progenitor species, durum wheat  
298 and *T. dicoccoides* have the duplication<sup>24</sup>. Further support for the orthologues on chromosome  
299 4 being similar to the previously characterized DWF4 is the high degree of synteny between  
300 wheat chromosome group 4, and rice chromosome 3, on which OsDWF4 resides, extending  
301 most of its length. In contrast, chromosome group 3 is the best conserved of all wheat  
302 chromosome groups, along both short and long arms, compared with rice chromosome 1<sup>51</sup>.

303 Based on the bioinformatic analysis the homoeologue on 4B was selected for creation of OE  
304 lines in order to understand the role of increased BR expression on increasing yield and NUE.  
305 Overexpression of *TaDWF4-B* resulted in dramatic increases in several agronomic measures  
306 including yield and biomass across a range of N levels. Interestingly, total biomass levels of WT  
307 plants started to approach those of OE lines as N levels increased, however this alone did not  
308 lead to a decrease in the difference in yields suggesting that biomass alone is a proxy and not a  
309 perfect measure of ultimate yield potential (Figure 1a, b). The OE lines showed significant  
310 increases in yield at all tested N levels and seemed to respond as if N was not limiting growth  
311 under low N. Similar results have been recently reported in maize overexpressing ZmDWF4  
312 grown under field conditions although different N levels were not tested<sup>52</sup>. Uptake rates of N as  
313 well as translocation rates did not differ between the OE or WT lines and similar levels of N  
314 were found in most tissues measured outside of the grain, suggesting that the OE lines did not  
315 demand an increased level of N to support the increased plant growth. The altered N sensing by  
316 higher DWF4 expression was supported by the expression of N regulated genes which showed  
317 a muted response to the removal of N in *TaDWF4-B* OE lines. This expression data suggests

318 that BR overexpression can mitigate nutrient limitations and that other signals such as C or  
319 soluble sugars are more important to drive yield gains while lowering the need for N input. This  
320 difference in growth was not due to a difference in the photosynthetic capacity, which has been  
321 previous suggested as the reason for increased yields<sup>30</sup>. Overall we observed assimilation rates  
322 and levels of chlorophyll were similar at high N levels (Figure 4). The maintenance of C  
323 assimilation under limited N conditions may contribute to the increased biomass and yield. The  
324 increase in levels of soluble sugars observed in WT plants including glucose possibly suggests  
325 an altered sensing of required nutrient signals to activate growth and development. This is  
326 supported by the higher expression of *TaTOR* under both N levels tested suggesting that  
327 *TaDWF4* OE lines maintain growth, where WT would slow down. Further work is required to  
328 understand the exact regulation of soluble sugars and other nutrient signals which mediates the  
329 increase in growth in DWF4 overexpressing lines. Based on the data generated here it is  
330 difficult to determine whether the increase in BR levels allowed growth to continue due to  
331 altered levels of soluble sugars, or whether the lack of BR pathway inhibition allowed the  
332 photosynthetic pathways to produce additional sugars and fuel further growth. Data collected  
333 here suggests that higher BR levels in wheat can redirect normal feedback inhibition of N  
334 limitation supporting continued plant growth. It would be interesting to determine if similar effects  
335 are observed with other common nutrient limitations such as phosphate or potassium.

336 Finally it has been suggested that breeding for increased BR levels could improve overall yields  
337 and improve the tolerance of crop species to various abiotic and biotic stress<sup>28,30,35,41</sup>.

338 Observations here also suggest that wheat breeders are not selecting for increased DWF4  
339 expression as DWF4 expression was not a significantly higher in the more modern spring wheat  
340 varieties tested (Figure 7). There were significant differences in DWF4 expression between the  
341 varieties tested as well as in response to N levels suggesting that variation may exist allowing  
342 for selection for higher expression in wheat shoots.

343 Overall, we have shown that OE of *TaDWF4* in wheat leads to plants which grow as if they need  
344 less N, increasing overall NUE. The plants do not sense N as a limitation to growth and keep  
345 growing under lower N levels. Based on these results we propose that a doubling of *TaDWF4*  
346 expression could allow farmers to reduce application of N fertilizer by up to 70 kg/ha whilst still  
347 producing the same amount of yield per plant as currently grown at standard 210 kg/ha N input  
348 level. When this 70 kg/ha saving is multiplied by the estimated land in which wheat is grown in  
349 the UK (1.69 million ha in 2019) there is the potential to reduce CO<sub>2</sub> released into the  
350 atmosphere from fertilizer production by over 100,000 t<sup>5,53,54</sup>. This is equivalent to the energy  
351 needed to power and heat more than 15,000 UK homes for one year<sup>55</sup>. Here we show that it is  
352 possible to increase levels of DWF4 in wheat through genetic modification but that there is also  
353 potential to exploit native variation via traditional breeding. This could potentially have a large  
354 impact on wheat crop management, reducing fertiliser demands whilst maintaining levels of  
355 productivity.

356

## 357 **Materials and Methods:**

358 **Gene identification:** The *OsDWF4* coding sequence from NCBI (XP\_015633105.1) was used  
359 as a query for BLAST searches of the wheat genome (IWGSC 2014) and expressed sequence  
360 tag (EST) databases in GenBank (<http://www.ncbi.nlm.nih.gov/>), Ensembl  
361 (<http://plants.ensembl.org/index.html>) and Komugi (<https://shigen.nig.ac.jp/wheat/komugi/>).  
362 Gene prediction was carried out using FGENESH ([www.softberry.com](http://www.softberry.com)). Protein domain  
363 prediction was found using InterProScan (<https://www.ebi.ac.uk/interpro/>). Identification of  
364 DWF4 like genes was based on sequences in Ensembl (version 42) using BLASTP and using  
365 an e value cut off of  $< 1e^{-50}$ .

## 366 **Plasmid construction for genetic modification:**



367 *TaDWF4-B* was synthesized from the public sequence available for the wheat cultivar Chinese  
368 Spring with attL1 and attL2 sites for direct recombination into a binary gateway vector. All  
369 primers used in this study are listed in Supplemental Table 1. *TaDWF4-B* was then recombined  
370 into the binary vector pSc4ActR1R2 using a Gateway LR Clonase II Kit (ThermoFisher) to create  
371 pMM90. *TaDWF4-B* was expressed *in planta* from the rice *Actin* promoter and transcripts  
372 terminated by the *Agrobacterium tumefaciens* nopaline synthase terminator (tNOS)<sup>42</sup>.  
373 pMM90 was verified by restriction digest and sequencing before being electro-transformed into  
374 *A. tumefaciens* strain EHA105. Plasmids were re-isolated from *Agrobacterium* cultures and  
375 verified by restriction digest prior to use in wheat transformation experiments<sup>56</sup>.

## 376 **Plant materials**

377 Wheat cv. Fielder (USA) was used for genetic transformation experiments. The spring wheat  
378 varieties Baj-1 (India), Cadenza (UK), CDC Landmark (Canada), CDC Stanley (Canada),  
379 Lancer (Australia), Paragon (UK) and Weebill (Mexico) were obtained from the Germplasm  
380 Resource Unit, UK ([www.seedstor.ac.uk/search-browseaccessions.php?idCollection=35](http://www.seedstor.ac.uk/search-browseaccessions.php?idCollection=35)), and  
381 used in photosynthetic measurements.

## 382 **Plant growth conditions:**

383 Wheat cv. Fielder plants were grown in controlled environment chambers (Conviron) at 20 °C  
384 day/15 °C night with a 16 hr day photoperiod (approximately 400  $\mu\text{E m}^{-2} \text{s}^{-1}$ ) for harvest of  
385 immature embryos for the transformation experiments.

386 Transgenic lines and corresponding null segregants were grown on TS5 low fertility soil to  
387 control total nitrogen with a starting nitrogen level of 0.1 mg/l (Bourne Amenity, Kent, UK).  
388 Ammonium nitrate was then added to reach a final concentration in the pots which contained  
389 roughly 750 g of dry soil in each pot. Equivalent to field fertiliser application of 70, 140 or 210

390 kg/ha N which equates to 23.3, 46.6 or 70 mg/pot. Each pot also received 4.2 mg Ca, 2.7 mg K,  
391 0.62 mg Mg, 0.04 mg P, 0.56 mg S, 0.008 mg B, 0.13 mg Fe, 0.015 mg Mn, 0.0012 mg Cu,  
392 0.0024 Mo, 0.0045 Zn, 0.00 mg Na, and 0.63 mg Cl per pot. Plants were grown in a climate  
393 controlled glasshouse with supplemental light for a 16 hr day and 20 °C/15 °C day night  
394 temperatures.

395 For transcript abundance measurements and sugar content, wheat seedlings were grown for  
396 ten days in 2.2 L pots containing Magnavaca solution containing 3 µM KH<sub>2</sub>PO<sub>4</sub>, 3.52 mM  
397 Ca(NO<sub>3</sub>)<sub>2</sub>, 0.58 mM, KCl, 0.58 mM K<sub>2</sub>SO<sub>4</sub>, 0.56 mM KNO<sub>3</sub>, 0.86 mM Mg(NO<sub>3</sub>)<sub>2</sub> 0.13 mM H<sub>3</sub>BO<sub>3</sub>,  
398 5 µM MnCl<sub>2</sub>, 0.4 µM Na<sub>2</sub>MoO<sub>4</sub>, 10 µM ZnSO<sub>4</sub>, 0.3 µM CuSO<sub>4</sub>, Fe(NO<sub>3</sub>)<sub>3</sub> and 2 mM MES (pH 5.5)  
399 and supplemented with either 0, 0.4 mM, 0.8 mM or 1.3 mM NH<sub>4</sub>NO<sub>3</sub>. Plants were harvested on  
400 the tenth day separating tissue in to roots and shoots for analysis.

401 Plants were grown on Magnavaca solution containing either 0 or 1.3 mM NH<sub>4</sub>NO<sub>3</sub> for ten days in  
402 controlled environment chambers (Conviron) at 20 °C day/15 °C night with a 16 hr day  
403 photoperiod (approximately 400 µE m<sup>-2</sup> s<sup>-1</sup>).

#### 404 **Wheat transformation:**

405 Immature seeds were collected 14-20 days post-anthesis (dpa) and immature wheat embryos  
406 were isolated and co-cultivated with *Agrobacterium tumefaciens* for 2 days in the dark<sup>57</sup>.

407 Subsequent removal of the embryonic axis and tissue culture was performed as previously  
408 described<sup>58</sup>. Individual plantlets were hardened off following transfer to Jiffy-7 pellets (LBS

409 Horticulture), potted up into 9 cm plant pots containing M2 compost plus 5g/l slow release

410 fertiliser (Osmocote Exact 15:9:9) and grown to maturity and seed harvest in controlled

411 environment chambers, as above.

#### 412 **DNA analysis of transformed wheat plants:**

413 Plantlets that regenerated under G418 selection in tissue culture, were tested for the presence  
414 of the *nptII* gene using QPCR. The *nptII* copy number was assayed relative to a single copy  
415 wheat gene amplicon, GaMyb, normalized to a known single copy wheat line<sup>59</sup>. Primers and  
416 Taqman probes were used at a concentration of 10  $\mu$ M in a 10  $\mu$ l multiplex reaction using  
417 Absolute Blue qPCR ROX mix (Thermofisher) with the standard run conditions for the ABI 7900  
418 HT. The relative quantification,  $\Delta\Delta^{CT}$ , values were calculated to determine *nptII* copy number in  
419 the T<sub>0</sub> and subsequent generations<sup>60</sup>. Homozygous and null transgenic lines were identified on  
420 the basis of *nptII* copy number and segregation analysis. WT Fielder plants were null  
421 segregates.

#### 422 **Transcript level analysis:**

423 Total RNA was isolated from both roots and shoots for each nitrogen treatment using an  
424 RNeasy Kit (Qiagen). Following treatment with DNaseI (Thermofisher), cDNA synthesis was  
425 conducted on 500 ng of total RNA using Omniscript RT Kit (Qiagen). The cDNA was diluted 1:2  
426 with water and 0.5  $\mu$ L was used as template in each RT-PCR reaction. Transcripts levels were  
427 quantified using SYBR Green JumpStartTaq ReadyMix (SIGMA) with the standard run  
428 conditions for the ABI 7900 HT. Three technical replicates were performed on each of the three  
429 biological replicates. Two reference genes *TaUbiquitin* and *TaEF1 $\alpha$*  were used for the  
430 normalization using the  $\Delta\Delta^{CT}$ . The sequence of primers used in QPCR assays are shown in  
431 Table S1.

#### 432 **Whole plant measurements:**

433 Total shoot dry weight, seed weight (yield per plant), seed number, seed size, and tiller number  
434 were measured at maturity and following two weeks of drying at 35 °C. Biological replicates  
435 each contained 15 plants per line and were grown until seed maturation and grown in two

436 separate experiments. NUE was calculated as yield per plant divided by the amount of  
437 ammonium nitrate added.

#### 438 **C and N content determination, N uptake:**

439 Wheat tissues (leaf or grains) were dried at 75 °C for 48 h before grinding. Four grains were  
440 placed in 2 mL microfuge tubes with 2 x 5 mm diameter stainless steel beads and shaken in a  
441 genogrinder until a fine powder was obtained. Dried and ground samples were carefully  
442 weighed (0.5 mg) into tin capsules, sealed and loaded into the auto-sampler. Samples were  
443 analyzed for percentage carbon, percentage nitrogen,  $^{12}\text{C}/^{13}\text{C}$  ( $\delta^{13}\text{C}$ ) and  $^{14}\text{N}/^{15}\text{N}$  ( $\delta^{15}\text{N}$ ) using a  
444 Costech Elemental Analyzer attached to a Thermo DELTA V mass spectrometer in continuous  
445 flow mode.

446 To measure N uptake, roots from 2 week old seedlings were exposed to  $^{15}\text{NH}_4^{15}\text{NO}_3$  for 5 min,  
447 then washed in 0.1 mM  $\text{CaSO}_4$  for 1 min, harvested, and dried at 70 °C for 48 h. N content and  
448 isotopic levels were analyzed as described above. The excess  $^{15}\text{N}$  was calculated based on  
449 measurements of  $\delta^{15}\text{N}$  and tissue N%. First the absolute isotope ratio (R) was calculated for  
450 labelled samples and controls, using  $R_{\text{standard}}$  (the absolute value of the natural abundance of  $^{15}\text{N}$   
451 in atmospheric  $\text{N}_2$ ; 1).

$$452 \quad (1) R_{\text{sample or control}} = [(\delta^{15}\text{N}/1000)+1] \times R_{\text{standard}}$$

453 Then, molar fractional abundance (F) and mass-based fractional abundance (MF) were  
454 calculated (2,3,4)

$$455 \quad (2) F = R_{\text{sample or control}} / (R_{\text{sample or control}} + 1)$$

$$456 \quad (3) \text{MF} = (F \times 15) \times / [(F \times 15) + ((1-F) \times 14)]$$

$$457 \quad (4) \Delta\text{MF} = \text{MF}_{\text{sample}} - \text{MF}_{\text{control}}$$

458 The excess  $^{15}\text{N}$  in mg in a total tissue was calculated as in (5)

459 (5) Excess  $^{15}\text{N}$  (g) =  $\Delta\text{MF} \times \text{Tissue dw (g)} \times \text{Tissue N\%/100}$

#### 460 **Chlorophyll measurements**

461 Leaf chlorophyll content was determined using the method developed by Hiscox et al.<sup>61</sup>.

462 Chlorophyll was extracted from 100mg of fresh leaf tissue from six independent plants in 10mL

463 DMSO, mixed for 30 mins and then placed at 4 °C overnight. Extracts were diluted 1:2 with

464 DMSO before absorbance measurements at 645 and 663 nm (spectrophotometer Jenway

465 model 7315, Staffordshire, UK).

#### 466 **Leaf gas exchange**

467 Leaf level photosynthesis and stomatal conductance were measured on the youngest fully

468 expanded leaf from the main tiller of at least six wheat plants at the tillering stage (GS23) grown

469 in a controlled environment chamber with 16hr day and 20 °C/15 °C day night temperatures.

470 Photosynthesis and stomatal conductance were measured using a portable infrared gas

471 analyzer (Licor 6400XP, Licor Environmental). Gas exchange was measured at a PPFD of 1500

472  $\mu\text{mol m}^{-2} \text{s}^{-1}$  (using the LI-COR 6400 LED light source), block temperature was maintained at 22

473 °C, while humidity was maintained close to 60%. Each leaf was clamped in the Licor chamber,

474 and let to acclimate until  $\text{CO}_2$  concentrations in the chamber reached a steady state for 5 min.

475 Gas exchange measurements were recorded under a range of  $\text{CO}_2$  concentrations (400, 300,

476 200, 100, 400, 600, 800, 1000, 1200, 400 ppm).

#### 477 **Chlorophyll fluorescence measurements and $A/C_i$ curve analysis:**

478 An LI-6800 portable photosynthesis infrared gas analyzer system (LI-COR) equipped with a

479 multiphase flash fluorimeter was used to assess physiological differences for photosynthetic

480 parameters between transgenic and WT wheat plants. Measurements were taken on the fourth

481 leaf of plants grown on TS5 low fertility soil to control total nitrogen with a starting nitrogen level  
482 of 0.1 mg/l (Bourne Amenity, Kent, UK). Ammonium nitrate was then added to reach a final  
483 concentration in the pots equivalent to field fertiliser application of 70 or 210 kg/ha N. Plants  
484 were grown in a climate-controlled chamber with supplemented light ( $250 \mu\text{mol}\cdot\text{m}^{-2}\cdot\text{s}^{-1}$ ) for a 16  
485 hr day and  $20^\circ\text{C}/15^\circ\text{C}$  day night temperatures. For chlorophyll fluorescence measurements  
486  $(F_m' - F_o') / F_m'$  leaves from at least six plants were pulsed four times to acclimatize tissues and  
487 a steady state reading taken. For measurements of the  $A/C_i$  curve was measured on six plants  
488 for each treatment. Ca reference values were 400, 400, 300, 200, 100, 50, 25, 400, 400, 400,  
489 600, 800, 1,000, 1,200, and  $400 \mu\text{L L}^{-1}$ , with a saturating rectangular pulse of  $12,000 \mu\text{mol m}^{-2}$   
490  $\text{s}^{-1}$  at each reference point. All leaves were also normalized for the amount of area of the  
491 measuring disk. Measurements were carried out on consecutive days between 1 and 8 h  
492 postdawn, measuring three plants total selected at random from each treatment per day.

#### 493 **Sugar measurements:**

494 Freeze-dried samples were ground to a fine powder with a pestle and mortar. A 50 mg sub  
495 sample of leaf tissue and 25 mg of root tissue were extracted in 1 and 2 ml of ultra-pure water,  
496 (Elgastat UHQPS), respectively. The extracts were mixed for 2 minutes on a miximatic  
497 (Jencons) and incubated for 60 minutes in a water bath at  $60^\circ\text{C}$  and mixed again. The solutions  
498 were centrifuged (Sigma 4-16 KS) at 4500 g for 20 minutes. Five hundred microlitres of the  
499 supernatant was pipetted into a Thomson 0.45  $\mu\text{m}$  PTFE filter vial (Thames Restek).

500 Five microliters of supernatant were injected into a Waters Alliance 2695 HPLC. Sugars were  
501 separated on an Ultra amino 100  $\text{\AA}$   $5 \mu\text{m}$   $250 \times 4.6 \text{ mm}$  column (Thames Restek, UK) and  
502 detected with a Waters 2414 refractive index detector. The mobile phase was [80:20]  
503 [acetonitrile: water] with a flow rate of  $1 \text{ ml min}^{-1}$ , the column was heated to  $35^\circ\text{C}$ . Standards of  
504 known amounts of the sugars were injected into the HPLC and Empower<sup>TM</sup> 3 software was used

505 to produce linear calibration curves in the range of 0.625-10 µg for fructose, glucose, all curves  
506 had  $r^2$  greater than 0.998. These calibration curves were used to determine the concentration of  
507 the sugars found in the samples. Sugar standards were analar grade (Sigma Aldrich UK),  
508 solvents were HPLC grade (Fisher scientific).

509 **Statistical analyses:** Normal distribution of the data and equality of variance were verified  
510 using Shapiro and Levene tests (Lawstat package<sup>62</sup>), respectively. Analysis of variance  
511 (ANOVAs) or Wilcox Tests were run using the aov and TukeyHSD functions or wilcox.test  
512 function in the R environment with the null hypothesis of no difference between lines<sup>63</sup>. Tukey's  
513 post hoc test was added to identify each significant interaction between the lines tested. Data  
514 was plotted using R ggplot2<sup>64</sup>.

515 **Phylogenetic trees:** Trees were made using MEGA X<sup>65</sup>. Amino acid sequences were obtained  
516 from Ensembl. Amino acid sequences were aligned using the MUSCLE algorithm as part of  
517 MEGA X and the tree was constructed using the maximum likelihood method, Jones-Taylor-  
518 Thornton (JTT) model, with 500 bootstrap replications.

519

520 **Reporting summary.** Further information on research design is available in the Nature  
521 Research Reporting Summary linked to this article.

522

523 **Data availability.** Data and seed are available upon request from the corresponding author.  
524 Seed materials will be transferred under MTA.

525

526 **Acknowledgements.** This study was supported by BBSRC and the Newton–Bhabha Fund,  
527 under the Virtual Joint Centres in Agricultural Nitrogen Use initiative (BB/N013441/1:  
528 Cambridge–India Network in Translational Nitrogen (CINTRIN). We thank Dr. Gregory Reeves  
529 and Prof. Julian Hibberd (University of Cambridge) for assistance with photosynthetic  
530 measurements and CINTRIN members for additional discussions.

531

532 **Author contributions.** MC and SB generated the transgenic wheat plants. MM performed the  
533 molecular and biochemical analysis, plus growth and gas-exchange experiments. SMS  
534 performed <sup>15</sup>N uptake experiments. MM and SMS performed data analysis on their  
535 contributions. MM designed the experiments and wrote the manuscript with input and  
536 contributions from SMS, HG, ARB and EJW. All authors read and approved the final  
537 manuscript.

538

539 **Competing interests.** The authors declare no competing interests.

540



541 **References:**

- 542 1. Shewry, P. R. & Hey, S. J. The contribution of wheat to human diet and health. *Food and*  
543 *Energy Security* **4**, 178–202 (2015).
- 544 2. Voss-Fels, K. P. *et al.* Breeding improves wheat productivity under contrasting  
545 agrochemical input levels. *Nat. Plants* **5**, 706–714 (2019).
- 546 3. Ascott, M. J. *et al.* Global patterns of nitrate storage in the vadose zone. *Nat. Commun.* **8**,  
547 1–7 (2017).
- 548 4. Delgado, J. A., Del Grosso, S. J. & Ogle, S. M. 15N isotopic crop residue cycling studies  
549 and modeling suggest that IPCC methodologies to assess residue contributions to N<sub>2</sub>O-  
550 N emissions should be reevaluated. *Nutr. Cycl. Agroecosystems* **86**, 383–390 (2010).
- 551 5. Brentrup, F., Hoxha, A. & Christensen, B. *Carbon footprint analysis of mineral fertilizer*  
552 *production in Europe and other world regions.* (2016).
- 553 6. Swarbreck, S. M. *et al.* A Roadmap for Lowering Crop Nitrogen Requirement. *Trends in*  
554 *Plant Science* **24**, 892–904 (2019).
- 555 7. Raun, W. R. & Johnson, G. V. Improving nitrogen use efficiency for cereal production.  
556 *Agronomy Journal* **91**, 357–363 (1999).
- 557 8. Simkin, A. J., López-Calcagno, P. E. & Raines, C. A. Feeding the world: improving  
558 photosynthetic efficiency for sustainable crop production. *J. Exp. Bot.* **70**, 1119–1140  
559 (2019).
- 560 9. Ort, D. R. *et al.* Redesigning photosynthesis to sustainably meet global food and  
561 bioenergy demand. *Proc. Natl. Acad. Sci. U. S. A.* **112**, 8529–36 (2015).
- 562 10. Long, S. P., Marshall-Colon, A. & Zhu, X. G. Meeting the global food demand of the  
563 future by engineering crop photosynthesis and yield potential. *Cell* **161**, 56–66 (2015).
- 564 11. South, P. F., Cavanagh, A. P., Liu, H. W. & Ort, D. R. Synthetic glycolate metabolism  
565 pathways stimulate crop growth and productivity in the field. *Science (80-. ).* **363**, (2019).
- 566 12. Kromdijk, J. *et al.* Improving photosynthesis and crop productivity by accelerating  
567 recovery from photoprotection. *Science* **354**, 857–861 (2016).

- 568 13. Raun, W. R. & Johnson, G. V. Improving Nitrogen Use Efficiency for Cereal Production.  
569 *Agron. J.* **91**, 357 (1999).
- 570 14. Renny-Byfield, S. & Wendel, J. F. Doubling down on genomes: Polyploidy and crop  
571 plants. *Am. J. Bot.* **101**, 1711–1725 (2014).
- 572 15. Chen, Z. J. Genetic and epigenetic mechanisms for gene expression and phenotypic  
573 variation in plant polyploids. *Annual Review of Plant Biology* **58**, 377–406 (2007).
- 574 16. Van De Peer, Y., Maere, S. & Meyer, A. The evolutionary significance of ancient genome  
575 duplications. *Nature Reviews Genetics* **10**, 725–732 (2009).
- 576 17. Huang, S. *et al.* Phylogenetic analysis of the acetyl-CoA carboxylase and 3-  
577 phosphoglycerate kinase loci in wheat and other grasses. *Plant Mol. Biol.* **48**, 805–820  
578 (2002).
- 579 18. Mcfadden, E. S. & Sears, E. R. The origin of triticum spelta and its free-threshing  
580 hexaploid relatives. *J. Hered.* **37**, 107–116 (1946).
- 581 19. Matsuoka, Y. Evolution of polyploid triticum wheats under cultivation: The role of  
582 domestication, natural hybridization and allopolyploid speciation in their diversification.  
583 *Plant and Cell Physiology* **52**, 750–764 (2011).
- 584 20. Cheng, H. *et al.* Frequent intra- and inter-species introgression shapes the landscape of  
585 genetic variation in bread wheat. *Genome Biol.* **20**, 136 (2019).
- 586 21. Pumphrey, M., Bai, J., Laudencia-Chingcuanco, D., Anderson, O. & Gill, B. S.  
587 Nonadditive expression of homoeologous genes is established upon polyploidization in  
588 hexaploid wheat. *Genetics* **181**, 1147–1157 (2009).
- 589 22. Akhunova, A. R., Matniyazov, R. T., Liang, H. & Akhunov, E. D. Homoeolog-specific  
590 transcriptional bias in allopolyploid wheat. *BMC Genomics* **11**, 505 (2010).
- 591 23. Feldman, M., Levy, A. A., Fahima, T. & Korol, A. Genomic asymmetry in allopolyploid  
592 plants: Wheat as a model. *Journal of Experimental Botany* **63**, 5045–5059 (2012).
- 593 24. Marcussen, T. *et al.* Ancient hybridizations among the ancestral genomes of bread  
594 wheat. *Science (80-. )*. **345**, 1250092 (2014).
- 595 25. Clavijo, B. J. *et al.* An improved assembly and annotation of the allohexaploid wheat

- 596 genome identifies complete families of agronomic genes and provides genomic evidence  
597 for chromosomal translocations. *Genome Res.* **27**, 885–896 (2017).
- 598 26. Ahammed, G. J., Li, X., Liu, A. & Chen, S. Brassinosteroids in Plant Tolerance to Abiotic  
599 Stress. *Journal of Plant Growth Regulation* **39**, 1451–1464 (2020).
- 600 27. Nolan, T. M., Vukasinović, N., Liu, D., Russinova, E. & Yin, Y. Brassinosteroids:  
601 Multidimensional regulators of plant growth, development, and stress responses. in *Plant*  
602 *Cell* **32**, 298–318 (American Society of Plant Biologists, 2020).
- 603 28. Sakamoto, T. *et al.* Erect leaves caused by brassinosteroid deficiency increase biomass  
604 production and grain yield in rice. *Nat. Biotechnol.* **24**, 105–109 (2006).
- 605 29. Morinaka, Y. *et al.* Morphological Alteration Caused by Brassinosteroid Insensitivity  
606 Increases the Biomass and Grain Production of Rice. *Plant Physiol.* **141**, 924–931  
607 (2006).
- 608 30. Wu, C. *et al.* Brassinosteroids regulate grain filling in rice. *Plant Cell* **20**, 2130–45 (2008).
- 609 31. Sahni, S. *et al.* Overexpression of the brassinosteroid biosynthetic gene DWF4 in  
610 Brassica napus simultaneously increases seed yield and stress tolerance. *Sci. Rep.* **6**,  
611 28298 (2016).
- 612 32. Eremina, M. *et al.* Brassinosteroids participate in the control of basal and acquired  
613 freezing tolerance of plants. *Proc. Natl. Acad. Sci. U. S. A.* **113**, E5982–E5991 (2016).
- 614 33. Li, X.-J. *et al.* Overexpression of a brassinosteroid biosynthetic gene Dwarf enhances  
615 photosynthetic capacity through activation of Calvin cycle enzymes in tomato. *BMC Plant*  
616 *Biol.* **16**, 33 (2016).
- 617 34. Nie, S. *et al.* Enhancing Brassinosteroid Signaling via Overexpression of Tomato  
618 (Solanum lycopersicum) SIBR11 Improves Major Agronomic Traits. *Front. Plant Sci.* **8**,  
619 1386 (2017).
- 620 35. Li, X.-J. J. *et al.* DWARF overexpression induces alteration in phytohormone  
621 homeostasis, development, architecture and carotenoid accumulation in tomato. *Plant*  
622 *Biotechnol. J.* **14**, 1021–1033 (2016).
- 623 36. Xiong, Y. *et al.* Glc-TOR signalling leads transcriptome reprogramming and meristem

- 624 activation. *Nature* **496**, 181 (2013).
- 625 37. Zhang, Z. *et al.* TOR Signaling Promotes Accumulation of BZR1 to Balance Growth with  
626 Carbon Availability in Arabidopsis. *Curr. Biol.* **26**, 1854–1860 (2016).
- 627 38. Deprost, D. *et al.* The Arabidopsis TOR kinase links plant growth, yield, stress resistance  
628 and mRNA translation. *EMBO Rep.* **8**, 864–70 (2007).
- 629 39. Borrill, P., Ramirez-Gonzalez, R. & Uauy, C. expVIP: A customizable RNA-seq data  
630 analysis and visualization platform. *Plant Physiol.* **170**, 2172–2186 (2016).
- 631 40. Choe, S. *et al.* The DWF4 gene of Arabidopsis encodes a cytochrome P450 that  
632 mediates multiple 22 $\alpha$ -hydroxylation steps in brassinosteroid biosynthesis. *Plant Cell* **10**,  
633 231–243 (1998).
- 634 41. Liu, T. *et al.* Expression and functional analysis of ZmDWF4, an ortholog of Arabidopsis  
635 DWF4 from maize (*Zea mays* L.). *Plant Cell Rep.* **26**, 2091–2099 (2007).
- 636 42. McElroy, D., Zhang, W., Cao, J. & Wu, R. Isolation of an efficient actin promoter for use in  
637 rice transformation. *Plant Cell* **2**, 163–71 (1990).
- 638 43. Coll-Garcia, D., Mazuch, J., Altmann, T. & Müssig, C. EXORDIUM regulates  
639 brassinosteroid-responsive genes. *FEBS Lett.* **563**, 82–86 (2004).
- 640 44. Choe, S. *et al.* Overexpression of DWARF4 in the brassinosteroid biosynthetic pathway  
641 results in increased vegetative growth and seed yield in Arabidopsis. *Plant J.* **26**, 573–82  
642 (2001).
- 643 45. Chung, Y. & Choe, S. The Regulation of Brassinosteroid Biosynthesis in Arabidopsis.  
644 *CRC. Crit. Rev. Plant Sci.* **32**, 396–410 (2013).
- 645 46. Cui, X.-Y. *et al.* BES/BZR Transcription Factor TaBZR2 Positively Regulates Drought  
646 Responses by Activation of TaGST1. *Plant Physiol.* **180**, 605 (2019).
- 647 47. Wang, Z. Y., Seto, H., Fujioka, S., Yoshida, S. & Chory, J. BRI1 is a critical component of  
648 a plasma-membrane receptor for plant steroids. *Nature* **410**, 380–383 (2001).
- 649 48. *Nitrogen for winter wheat-management guidelines THE N MANAGEMENT CYCLE 2*  
650 *Nitrogen for winter wheat-management guidelines.* (2009).

- 651 49. Buchner, P. & Hawkesford, M. J. Complex phylogeny and gene expression patterns of  
652 members of the NITRATE TRANSPORTER 1/PEPTIDE TRANSPORTER family (NPF) in  
653 wheat. *J. Exp. Bot.* **65**, 5697–5710 (2014).
- 654 50. Curci, P. L. *et al.* Transcriptomic response of durum wheat to nitrogen starvation. *Sci.*  
655 *Rep.* **7**, 1176 (2017).
- 656 51. La Rota, M. & Sorrells, M. E. Comparative DNA sequence analysis of mapped wheat  
657 ESTs reveals the complexity of genome relationships between rice and wheat. *Funct.*  
658 *Integr. Genomics* **4**, 34–46 (2004).
- 659 52. Liu, N. *et al.* Overexpression of ZmDWF4 improves major agronomic traits and enhances  
660 yield in maize. *Mol. Breed.* **40**, 1–12 (2020).
- 661 53. (No Title). Available at:  
662 [https://assets.publishing.service.gov.uk/government/uploads/system/uploads/attachment](https://assets.publishing.service.gov.uk/government/uploads/system/uploads/attachment_data/file/868936/structure-jun2019provcrops-eng-28feb20.pdf)  
663 [\\_data/file/868936/structure-jun2019provcrops-eng-28feb20.pdf](https://assets.publishing.service.gov.uk/government/uploads/system/uploads/attachment_data/file/868936/structure-jun2019provcrops-eng-28feb20.pdf). (Accessed: 26th August  
664 2020)
- 665 54. Farming Statistics Provisional crop areas, yields and livestock populations At June 2019 -  
666 United Kingdom. *Office of National Statistics* 1–24 (2019). Available at:  
667 [https://assets.publishing.service.gov.uk/government/uploads/system/uploads/attachment](https://assets.publishing.service.gov.uk/government/uploads/system/uploads/attachment_data/file/868943/structure-jun2019prov-UK-28feb20.pdf)  
668 [\\_data/file/868943/structure-jun2019prov-UK-28feb20.pdf](https://assets.publishing.service.gov.uk/government/uploads/system/uploads/attachment_data/file/868943/structure-jun2019prov-UK-28feb20.pdf). (Accessed: 15th September  
669 2021)
- 670 55. US EPA, O. Greenhouse Gas Equivalencies Calculator.
- 671 56. Bates, R., Craze, M. & Wallington, E. J. Agrobacterium -Mediated Transformation of  
672 Oilseed Rape ( Brassica napus ). in *Current Protocols in Plant Biology* 287–298 (2017).  
673 doi:10.1002/cppb.20060
- 674 57. Ishida, Y., Tsunashima, M., Hiei, Y. & Komari, T. Wheat (*Triticum aestivum* L.)  
675 Transformation Using Immature Embryos. in *Methods in molecular biology (Clifton, N.J.)*  
676 **1223**, 189–198 (2015).
- 677 58. Risacher, T., Craze, M., Bowden, S., Paul, W. & Barsby, T. Highly Efficient  
678 Agrobacterium-Mediated Transformation of Wheat Via In Planta Inoculation. in *Methods*  
679 *in molecular biology (Clifton, N.J.)* **478**, 115–124 (2009).

- 680 59. Milner, M. J. *et al.* A PSTOL-like gene, TaPSTOL, controls a number of agronomically  
681 important traits in wheat. *BMC Plant Biol.* **18**, 115 (2018).
- 682 60. Livak, K. J. & Schmittgen, T. D. Analysis of Relative Gene Expression Data Using Real-  
683 Time Quantitative PCR and the  $2^{-\Delta\Delta CT}$  Method. *Methods* **25**, 402–408 (2001).
- 684 61. Hiscox, J. D. & Israelstam, G. F. A method for the extraction of chlorophyll from leaf  
685 tissue without maceration. *Can. J. Bot.* **57**, 1332–1334 (1979).
- 686 62. Gastwirth, J. L., Gel, Y. R., Hui, W., Lyubchich, V., & Miao, W. Tools for Biostatistics,  
687 Public Policy and Law. 1–44 (2017).
- 688 63. Computing, R. F. for S. R Core Team (2018). R: A language and environment for  
689 statistical computing. (2018). Available at: <https://www.r-project.org/>.
- 690 64. Wickham, H. Introduction. in *ggplot2* (Springer New York, 2009). doi:10.1007/978-0-387-  
691 98141-3\_1
- 692 65. Kumar, S., Stecher, G., Li, M., Knyaz, C. & Tamura, K. MEGA X: Molecular Evolutionary  
693 Genetics Analysis across Computing Platforms. doi:10.1093/molbev/msy096
- 694
- 695

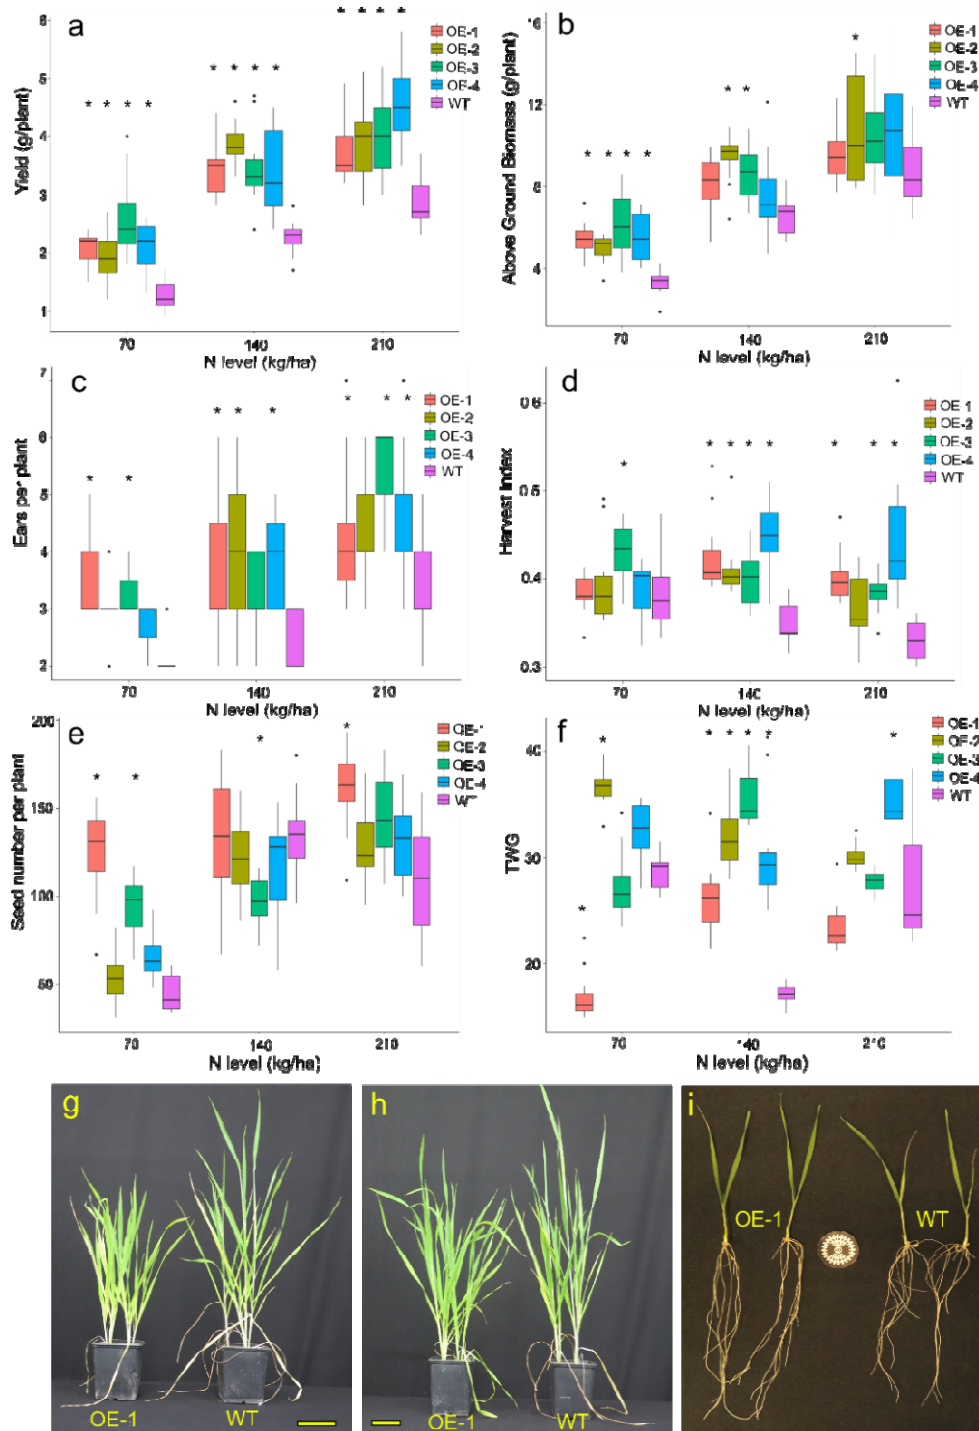

696

697 Figure 1: TaDWF4-B overexpressing lines show higher yield, above ground biomass, seed  
 698 number per plant and TGW and Harvest Index when grown under three N levels (eq. 70,  
 699 210, kg/ha). Data are shown as mean values (central line), lower and upper quartiles (box),  
 700 minimum and maximum values (whiskers) and outliers as individual points. Fifteen plants were  
 701 grown per replicate for each genotype by N level combination. The overall plant growth  
 702 experiment was replicated twice; data from one replicate is shown. The statistical analysis was  
 703 performed with ANOVA and post hoc Tukey test, asterisk denotes p val < 0.05. a) yield (g) per

704 plant; b) above ground biomass (g) per plant; c) ears per plant; d) Harvest Index; e) seed  
705 number per plant; f) Thousand Grain Weight per plant (TGW); g) OE-1 (left) and WT (right)  
706 plants grown on 70 kg/ha equivalent; h) OE-1 (left) and WT (right) plants grown on 210 kg/ha  
707 equivalent i); 10 day old plants from OE-1 (left) and WT (right) grown in hydroponic solution  
708 under at 70 kg/ha N. Yellow bars in g and h = 10 cm, size standard in i = 40 mm diameter. Full  
709 statistical comparisons are included in Suppl. Tables S2-7.

710



711

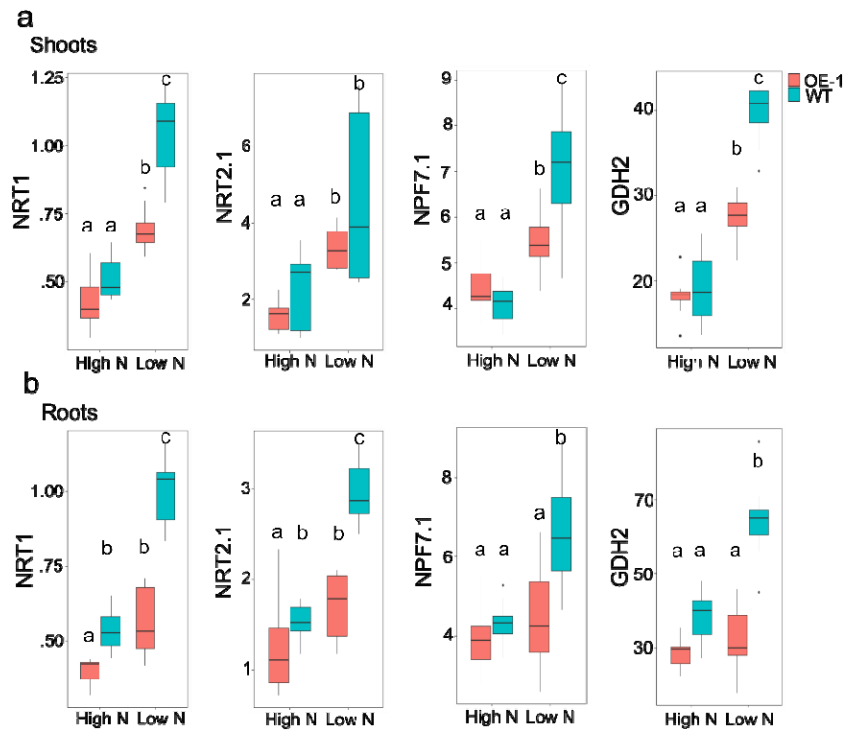

712

713

714 Figure 2: Transcript abundance for N regulated genes in shoots and roots of ten day old OE-1  
715 and WT seedlings under N limiting and N replete conditions. Transcript levels for NRT1,  
716 NRT2.1, NPF7.1, GDH2 genes in wheat are shown relative to the expression of *TaUbi* under  
717 low (LN) and high nitrogen (HN) in hydroponic solution in a) shoot; and b) root tissues. Data are  
718 shown as mean values (central line), lower and upper quartiles (box), minimum and maximum  
719 values (whiskers) and outliers as individual points. The statistical analysis was performed with  
720 ANOVA and post hoc Tukey test, letters correspond to significant differences between transcript  
721 levels of either line under either treatment (p < 0.05).

722

723

724

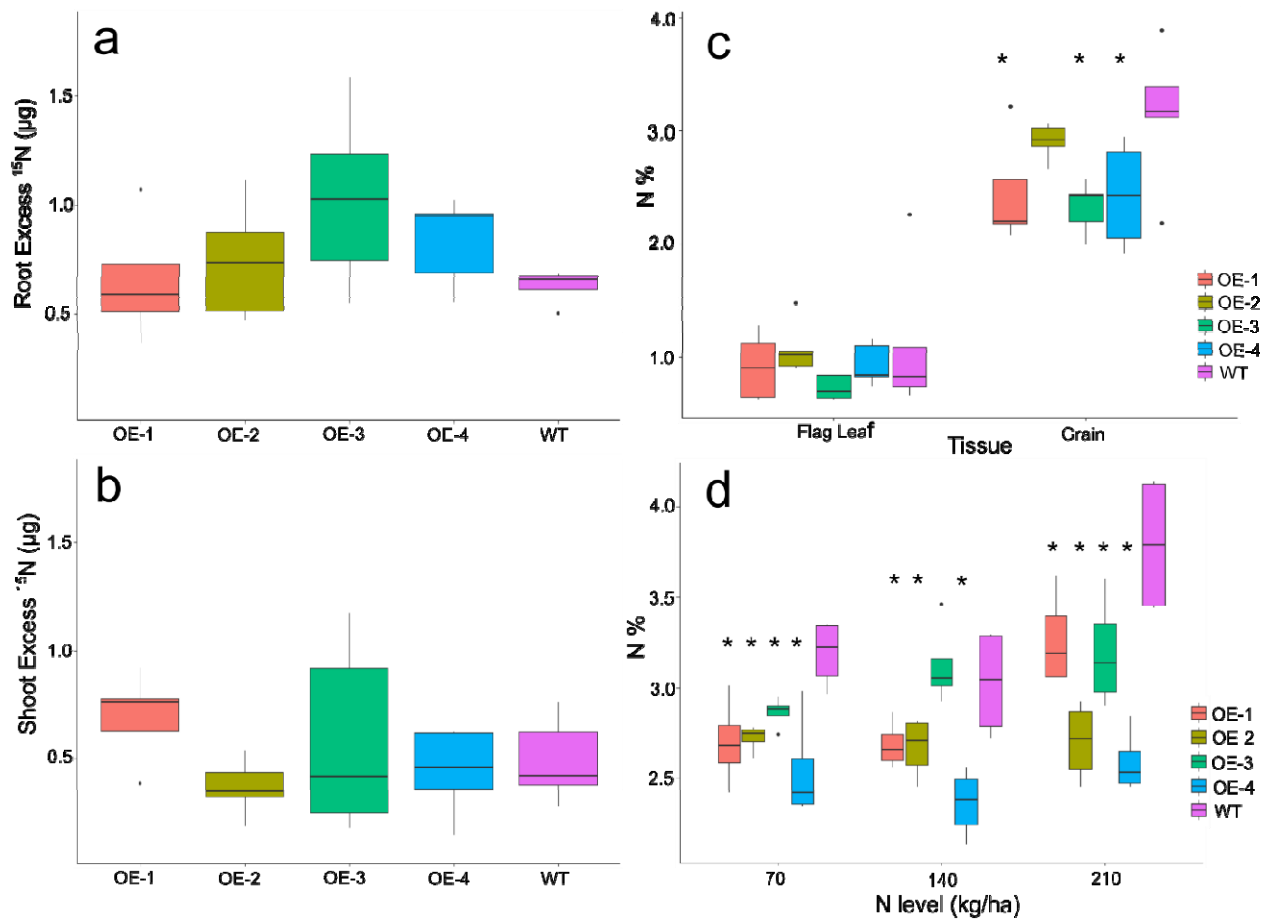

725

726 Figure 3: Nitrogen flux and concentrations of TaDWF4-B overexpression plants. a) Uptake of  
727  $^{15}\text{N}$  in roots of overexpression lines relative to WT roots; b) Translocation of  $^{15}\text{N}$  from the soil to  
728 the shoot in five minutes of uptake in OE lines relative to WT; c) Percentage N of flag leaves  
729 and grains grown on 210 kg/ha at harvest; d) N content of grain grown on three N levels. Data  
730 are shown as mean values (central line), lower and upper quartiles (box), minimum and  
731 maximum values (whiskers) and outliers as individual points. The statistical analysis was  
732 performed with ANOVA and post hoc Tukey test. Asterisks indicate a significant difference (p  
733 < 0.05) between WT and an OE line at the same N level.

734

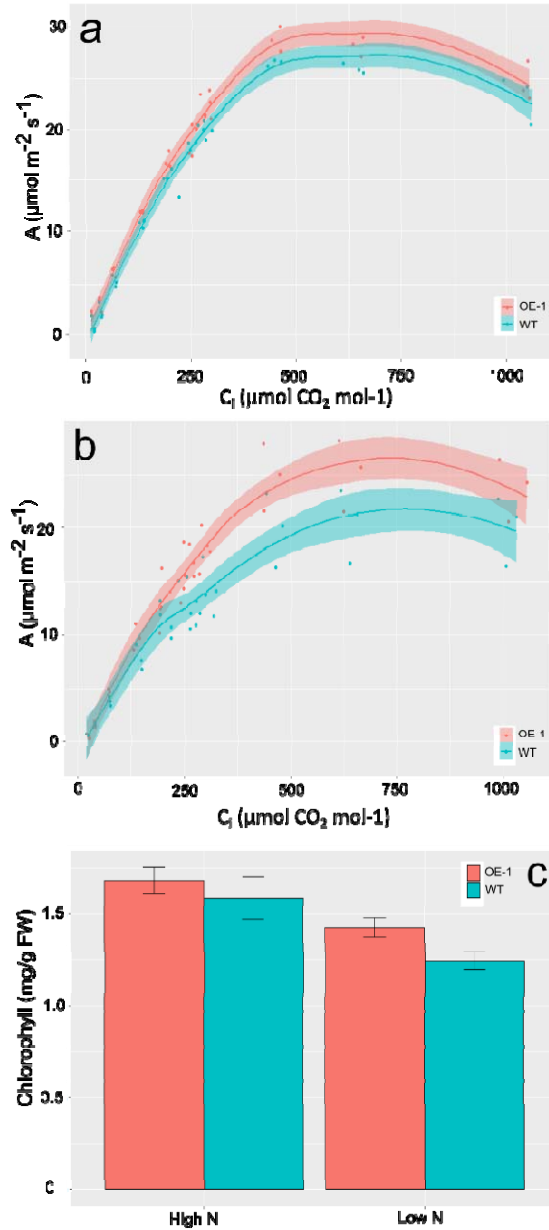

735

736 Figure 4: Photosynthetic C assimilation in the leaves of DWF4-B over-expression lines and WT  
737 under high (210 kg/ha) and low (70 kg/ha) N levels grown in growth chamber with a light  
738 intensity of  $1250 \mu\text{mol m}^{-2} \text{s}^{-1}$  and  $\text{CO}_2$  level of 400 ppm: a) A/Ci curve of OE-1 and WT plants  
739 grown on under high N conditions (equivalent N 210 kg/ha) or b) under low N conditions  
740 (equivalent N 70 kg/ha). c) Chlorophyll content in the leaves of plants used for A/Ci  
741 measurements. In panels a and b the shading represents the 95% confidence interval. In panel  
742 c the bars represent the mean and  $\pm$  SD. from six plants measured on the fourth fully expanded  
743 leaf.

744

745

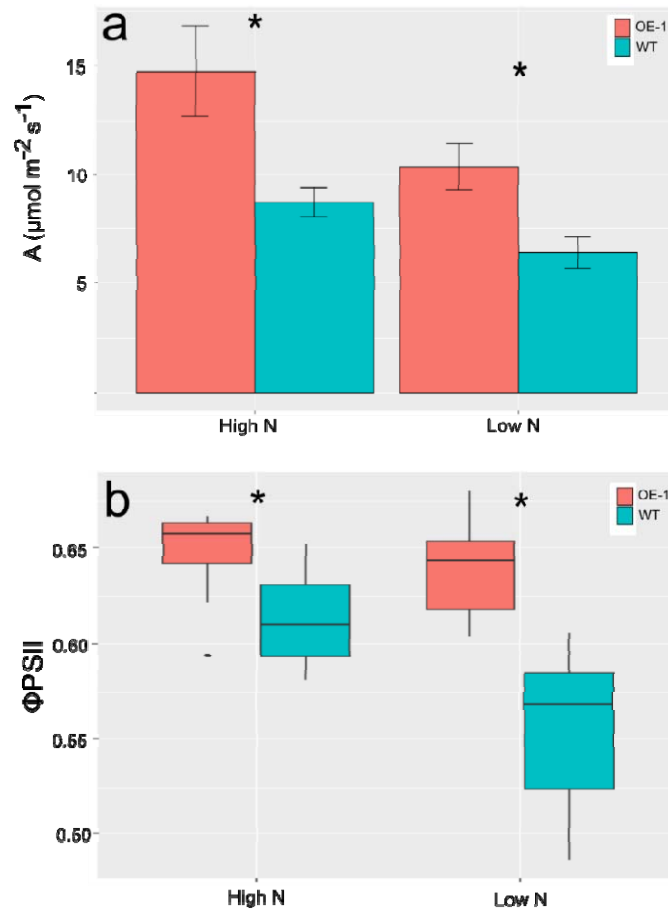

746

747 Figure 5: Photosynthetic performance of OE-1 or WT plants under low light conditions. a) Spot  
748 measurements of C assimilation in OE-1 or WT under grown in growth chamber conditions  
749 which include a light intensity of  $250 \mu\text{mol m}^{-2} \text{s}^{-1}$  and  $\text{CO}_2$  level of 400 ppm. b) Operational  
750 PSII efficiency ( $F_v'/F_m'$ ) in light adapted plants grown on two different N levels. Plants were  
751 grown on either (Low) 70 or (High) 210 kg/ha N equivalent and the fourth leaf was measured for  
752 PSII activity. The statistical analysis was performed with ANOVA and post hoc Tukey test.  
753 Data shown represent the mean  $\pm$  SD from six plants measured on the fourth leaf of when fully  
754 expanded leaf. Asterisk in panels a and b indicates a significant difference ( $p < 0.05$ ) between  
755 WT and OE-1 at the same N level.

756

757

758

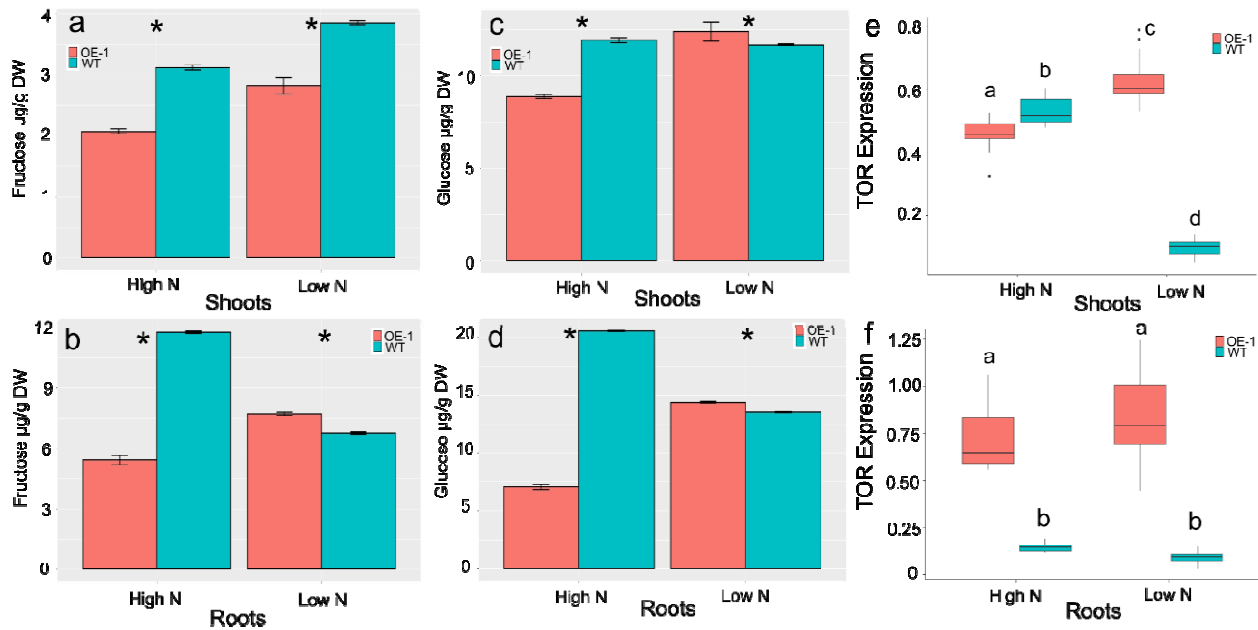

759

760 Figure 6: Root and shoot glucose and fructose content in OE-1 and WT wheat plants grown  
761 under high N or low N conditions in hydroponic solution, leads to increased transcript levels of  
762 *TaTOR*. Soluble sugars (fructose (a,b), glucose (c,d)) were extracted from wheat leaves of 14-  
763 day old plants grown High N (Full N) or Low N (0 N). The transcript abundance of *TaTOR* was  
764 measured in the shoots (e) and roots (f) in both OE-1 and WT 14-day old wheat plants grown  
765 under High N or Low N, expression shown is relative to *TaUbi*. n = 3 plants for each treatment  
766 and line tested. The statistical analysis in all panels was performed with ANOVA and post hoc  
767 Tukey test. Data in panels a, b and c represent the mean and  $\pm$  SD Asterisk indicates a  
768 significant difference (p < 0.05) between WT and OE-1 at the same N level. Data in panels d  
769 and e are shown as mean values (central line), lower and upper quartiles (box), minimum and  
770 maximum values (whiskers) and outliers as individual points. Letters in panels d and e indicate  
771 significant differences (p < 0.05) amongst both the line and the treatment.

772

773

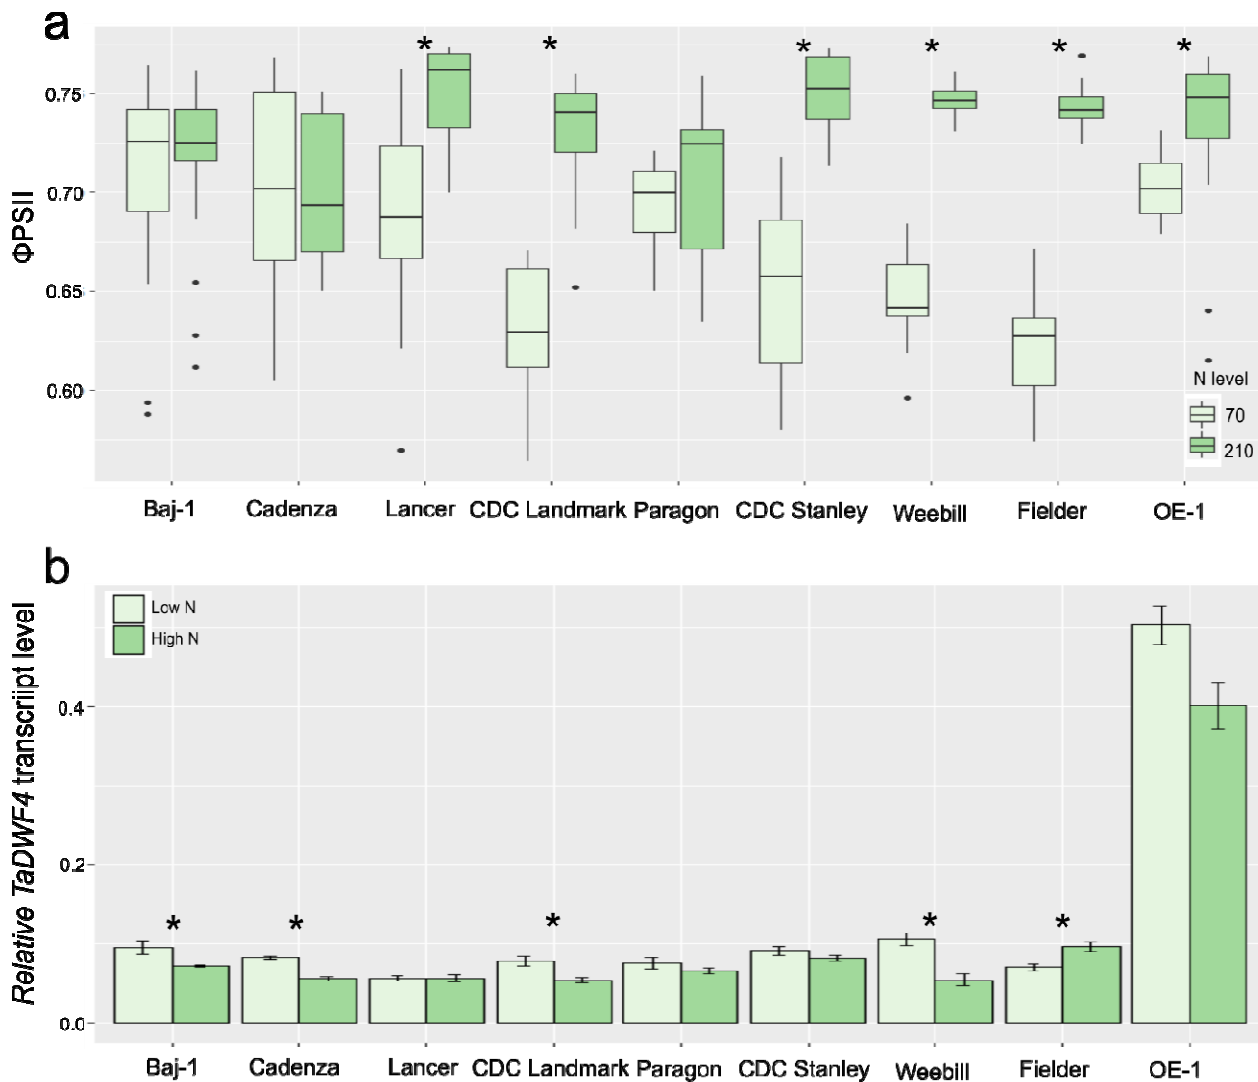

774

775 Figure 7: Evidence for indirect selection for BR indirectly through breeding: a) Operational PSII  
 776 efficiency in light adapted plants grown on two different N levels. Plants were grown on either 70  
 777 or 210 kg/ha N equivalent and the fourth leaf was measured for PSII activity. b) Expression of  
 778 *TaDWF4* in the shoots of 10-day old wheat plants grown under low N (LN=0 N) or high N  
 779 (HN=Full N), expression shown is relative to *TaUbi* in each cultivar. Data in panel a are shown  
 780 as the mean values (central line), lower and upper quartiles (box), minimum and maximum  
 781 values (whiskers) and outliers as individual points. Data in panel b are shown as the mean and  
 782  $\pm$  SD.  $n = 3$  plants for each treatment and line tested. Statistical analysis was performed with  
 783 ANOVA and post hoc Tukey test, asterisk indicates a significant difference between low and  
 784 high N levels ( $p < 0.05$ ).
